# Supplementary material for: Pervasive Genotypic Mosaicism in Founder Mice Derived from Genome Editing through Pronuclear Injection
Source: PubMed Central journal article supplement (PMC4459985; doi:10.1371/journal.pone.0129457), 2015-06-08
Supplement: pone.0129457.s001.pdf [file pone.0129457.s001.pdf]

| Gene/sgRNA for pX330 Ligation: | Fwd sgRNA Oligo (5'-3'):   |
|--------------------------------|----------------------------|
| <i>miR-34c-lox</i>             | caccg CGATTCACAGGAGGCTCAGT |
| <i>UbqlnL</i> gRNA1            | caccg GTTGCAGGTGTTGTGTTCTG |
| <i>UbqlnL</i> gRNA2            | caccg GAGAGGTGAGGGCAGGCAAG |
| <i>UbqlnL</i> gRNA3            | caccg GGTGATCGAGAGATAATACG |
| <i>miR-741</i> gRNA1           | caccg GAGTTATGATTTCTAATTGA |
| <i>miR-741</i> gRNA2           | caccg ATGCCATTCTATGTAGATTA |
| <i>miR-741</i> gRNA3           | caccg GAGCCTTAATCTACATAGAA |

| IVT Oligo:                      | Sequence (5'-3'):                                |
|---------------------------------|--------------------------------------------------|
| T7- <i>miR-34c-lox</i> gRNA Fwd | GCGTTAATACGACTCACTATAGGG<br>CGATTCACAGGAGGCTCAGT |
| T7- <i>UbqlnL</i> gRNA1 Fwd     | GCGTTAATACGACTCACTATAGGG<br>GTTGCAGGTGTTGTGTTCTG |
| T7- <i>UbqlnL</i> gRNA2 Fwd     | GCGTTAATACGACTCACTATAGGG<br>GAGAGGTGAGGGCAGGCAAG |
| T7- <i>UbqlnL</i> gRNA3 Fwd     | GCGTTAATACGACTCACTATAGGG<br>GGTGATCGAGAGATAATACG |
| T7- <i>miR-741</i> gRNA1 Fwd    | GCGTTAATACGACTCACTATAGGG<br>GAGTTATGATTTCTAATTGA |
| T7- <i>miR-741</i> gRNA2 Fwd    | GCGTTAATACGACTCACTATAGGG<br>ATGCCATTCTATGTAGATTA |
| T7- <i>miR-741</i> gRNA3 Fwd    | GCGTTAATACGACTCACTATAGGG<br>GAGCCTTAATCTACATAGAA |
| pX330 Universal gRNA Rev        | AAAAGCACCGACTCGGTGCC                             |

| Genotyping Gene:           | Genotyping Fwd Oligo (5'-3'): |
|----------------------------|-------------------------------|
| <i>miR-34c-lox</i>         | ACCCACACAAATTGATACATTGT       |
| <i>UbqlnL</i>              | AGGCCTCAGCTGAGCCACAT          |
| <i>UbqlnL</i> Deletion Fwd | TTCTGGCTGCTCTCCATCTG          |
| <i>miR-741</i>             | CAATGATCTTCCAAGGCCAC          |

Rev sgRNA Oligo (5'-3'):

---

aaacACTGAGCCTCCTGTGAATCGc  
aaacCAGAACACAACACCTGCAACc  
aaacCTTGCCTGCCCTCACCTCTCc  
aaacCGTATTATCTCTCGATCACCCc  
aaacTCAATTAGAAATCATAACTCc  
aaacTAATCTACATAGAATGGCATc  
aaacTTCTATGTAGATTAAGGCTCc

Genotyping Rev Oligo (5'-3'):

---

TTTTCTGAGTCTAGTTACTAGGC  
CACTAAGGTGTCATCAGCTACTGT

GGGCAGATCTGAGAATAGGT
