# Supplementary material for: Pervasive Genotypic Mosaicism in Founder Mice Derived from Genome Editing through Pronuclear Injection
Source: PubMed Central journal article supplement (PMC4459985; doi:10.1371/journal.pone.0129457), 2015-06-08
Supplement: pone.0129457.s002.pdf [file pone.0129457.s002.pdf]

| <b>Founder Mouse</b>                    | <b>F1 litter size (M/F)</b> |
|-----------------------------------------|-----------------------------|
| <i>miR-34c-lox</i> FP3 (testis removed) | 9 (5/4)                     |
| <i>miR-34c-lox</i> FP9 (testis removed) | 11 (4/7)                    |
| <i>UbqlnL</i> FP7 (testis removed)      | 8 (5/3)                     |
| <i>UbqlnL</i> FP10 (testis removed)     | 10 (5/5)                    |
| <i>miR-741</i> FP5 (testis removed)     | 7 (2/5)                     |
| <i>miR-741</i> FP15 (testis removed)    | 7 (4/3)                     |
